# Supplementary material for: Polymorphisms in Glutathione S-Transferase (GST) Genes Modify the Effect of Exposure to Maternal Smoking Metabolites in Pregnancy and Offspring DNA Methylation
Source: MDPI journal article supplement (doi:10.3390/genes14081644), 2023-08-18
Supplement: s1 [file s1]

Supplementary Table S1. Association of offspring *GST* gene polymorphism with nicotine and its downstream metabolites in maternal sera

| <i>GST</i> haplotype | Serum nicotine (nM) |         | Serum cotinine (nM) |         | Serum norcotinine (nM) |         | Serum hydroxycotinine (nM) |         |
|----------------------|---------------------|---------|---------------------|---------|------------------------|---------|----------------------------|---------|
|                      | Effect estimate (β) | P value | Effect estimate (β) | P value | Effect estimate (β)    | P value | Effect estimate (β)        | P value |
| <b>Males</b>         |                     |         |                     |         |                        |         |                            |         |
| rs506008             | 0.521               | 0.77    | -4.858              | 0.71    | -0.080                 | 0.44    | -2.160                     | 0.12    |
| AG                   | ref                 |         | ref                 |         | ref                    |         | ref                        |         |
| GG                   |                     |         |                     |         |                        |         |                            |         |
| rs574344             |                     |         |                     |         |                        |         |                            |         |
| AT                   | 0.349               | 0.88    | -14.904             | 0.37    | -0.129                 | 0.326   | -2.369                     | 0.18    |
| TT                   | ref                 |         | ref                 |         | ref                    |         | ref                        |         |
| rs12736389           |                     |         |                     |         |                        |         |                            |         |
| CG                   | -0.095              | 0.95    | 18.537              | 0.13    | 0.091                  | 0.34    | 0.852                      | 0.51    |
| GG                   | ref                 |         | ref                 |         | ref                    |         | ref                        |         |
| rs3768490            |                     |         |                     |         |                        |         |                            |         |
| AA                   | -1.072              | 0.67    | -4.583              | 0.80    | 0.042                  | 0.77    | -0.850                     | 0.67    |
| AC                   | 1.469               | 0.35    | 9.353               | 0.42    | 0.049                  | 0.59    | 0.715                      | 0.56    |
| CC                   | ref                 |         | ref                 |         | ref                    |         | ref                        |         |
| rs1537234            |                     |         |                     |         |                        |         |                            |         |
| AA                   | 0.768               | 0.74    | -24.208             | 0.15    | -0.121                 | 0.36    | -1.742                     | 0.33    |
| AC                   | 0.439               | 0.80    | -19.149             | 0.14    | -0.137                 | 0.18    | -1.551                     | 0.26    |
| CC                   | ref                 |         | ref                 |         | ref                    |         | ref                        |         |
| rs1695               |                     |         |                     |         |                        |         |                            |         |
| AA                   | 0.544               | 0.83    | -9.800              | 0.59    | -0.082                 | 0.56    | -1.484                     | 0.44    |
| AG                   | 0.405               | 0.87    | 7.663               | 0.67    | 0.066                  | 0.64    | 0.394                      | 0.83    |
| GG                   | ref                 |         | ref                 |         | ref                    |         | ref                        |         |
| <b>Females</b>       |                     |         |                     |         |                        |         |                            |         |
| rs506008             |                     |         |                     |         |                        |         |                            |         |
| AG                   | -1.660              | 0.27    | -9.101              | 0.20    | -0.059                 | 0.48    | -1.019                     | 0.39    |
| GG                   | ref                 |         | ref                 |         | ref                    |         | ref                        |         |
| rs574344             |                     |         |                     |         |                        |         |                            |         |
| AT                   | 1.206               | 0.51    | -5.85               | 0.52    | -0.055                 | 0.62    | -0.834                     | 0.59    |
| TT                   | ref                 |         | ref                 |         | ref                    |         | ref                        |         |
| rs12736389           |                     |         |                     |         |                        |         |                            |         |
| CG                   | 0.837               | 0.53    | -0.737              | 0.91    | 0.002                  | 0.98    | -0.229                     | 0.84    |
| GG                   | ref                 |         | ref                 |         | ref                    |         | ref                        |         |
| rs3768490            |                     |         |                     |         |                        |         |                            |         |
| AA                   | -3.430              | 0.17    | -6.969              | 0.50    | 0.082                  | 0.50    | 0.044                      | 0.98    |
| AC                   | 1.022               | 0.44    | 4.483               | 0.42    | 0.029                  | 0.65    | 0.049                      | 0.97    |
| CC                   | ref                 |         | ref                 |         | ref                    |         | ref                        |         |
| rs1537234            |                     |         |                     |         |                        |         |                            |         |
| AA                   | 1.083               | 0.59    | 12.027              | 0.23    | 0.182                  | 0.13    | 2.888                      | 0.09    |
| AC                   | 0.454               | 0.76    | 12.371              | 0.10    | 0.174                  | 0.06    | 2.464                      | 0.06    |
| CC                   | ref                 |         | ref                 |         | ref                    |         | ref                        |         |
| rs1695               |                     |         |                     |         |                        |         |                            |         |
| AA                   | 1.1541              | 0.58    | 6.684               | 0.50    | 0.031                  | 0.79    | 0.053                      | 0.97    |
| AG                   | 1.928               | 0.35    | 6.366               | 0.52    | 0.061                  | 0.60    | 0.808                      | 0.62    |
| GG                   | ref                 |         | ref                 |         | ref                    |         | ref                        |         |

Due to the rarity of the AA genotype for rs506008, individuals with the AA genotype were combined with the AG genotype. Due to the rarity of the AA genotype for rs574344, individuals with the AA genotype were combined with the AT genotype. Due to the rarity of the CC genotype for rs12736389, individuals with the CC genotype were combined with the CG genotype.
